# Supplementary material for: Generating knowledge graphs through text mining of catalysis research related literature
Source: Royal Society of Chemistry journal article supplement (doi:10.1039/d4cy00369a), 2024-01-01
Supplement: d4cy00369a1.xlsx [file d4cy00369a1.xlsx]

## Sheet: dataset 1
http://purl.obolibrary.org/obo/CHEBI_16052	['propene', 'propene']
http://purl.obolibrary.org/obo/CHEBI_17153	['propanal', 'propanal']
http://purl.obolibrary.org/obo/CHEBI_17245	['carbon monoxide', 'carbon monoxide (molecule)']
http://purl.obolibrary.org/obo/CHEBI_17478	['aldehyde', 'aldehyde']
http://purl.obolibrary.org/obo/CHEBI_17790	['methanol', 'methanol']
http://purl.obolibrary.org/obo/CHEBI_18153	['ethene', 'ethene (molecule)']
http://purl.obolibrary.org/obo/CHEBI_18291	['manganese atom', 'manganese atom']
http://purl.obolibrary.org/obo/CHEBI_24579	['1-hexene', '1-hexene']
http://purl.obolibrary.org/obo/CHEBI_25367	['molecule', 'molecule']
http://purl.obolibrary.org/obo/CHEBI_25741	['oxide', 'oxide']
http://purl.obolibrary.org/obo/CHEBI_25805	['oxygen atom', 'oxygen atom']
http://purl.obolibrary.org/obo/CHEBI_27363	['zinc atom', 'zinc atom']
http://purl.obolibrary.org/obo/CHEBI_27452	['styrene', 'styrene']
http://purl.obolibrary.org/obo/CHEBI_27560	['boron atom', 'boron atom']
http://purl.obolibrary.org/obo/CHEBI_27573	['silicon atom', 'silicon atom']
http://purl.obolibrary.org/obo/CHEBI_27594	['carbon atom', 'carbon atom']
http://purl.obolibrary.org/obo/CHEBI_27638	['cobalt atom', 'cobalt atom']
http://purl.obolibrary.org/obo/CHEBI_27698	['vanadium atom', 'vanadium atom']
http://purl.obolibrary.org/obo/CHEBI_27998	['tungsten', 'tungsten']
http://purl.obolibrary.org/obo/CHEBI_28659	['phosphorus atom', 'phosphorus atom']
http://purl.obolibrary.org/obo/CHEBI_28831	['propan-1-ol', 'propan-1-ol']
http://purl.obolibrary.org/obo/CHEBI_28984	['aluminium atom', 'aluminium atom']
http://purl.obolibrary.org/obo/CHEBI_29239	['hydride', 'hydride']
http://purl.obolibrary.org/obo/CHEBI_30045	['divanadium pentaoxide', 'divanadium pentaoxide']
http://purl.obolibrary.org/obo/CHEBI_30142	['lithium tetrahydroaluminate', 'lithium tetrahydroaluminate']
http://purl.obolibrary.org/obo/CHEBI_30145	['lithium atom', 'lithium atom']
http://purl.obolibrary.org/obo/CHEBI_30187	['aluminium oxide', 'aluminium oxide']
http://purl.obolibrary.org/obo/CHEBI_30563	['silicon dioxide', 'silicon dioxide']
http://purl.obolibrary.org/obo/CHEBI_30627	['molybdenum trioxide', 'molybdenum trioxide']
http://purl.obolibrary.org/obo/CHEBI_32234	['titanium dioxide', 'titanium dioxide']
http://purl.obolibrary.org/obo/CHEBI_32878	['alkene', 'alkene']
http://purl.obolibrary.org/obo/CHEBI_33330	['scandium atom', 'scandium atom']
http://purl.obolibrary.org/obo/CHEBI_33341	['titanium atom', 'titanium atom']
http://purl.obolibrary.org/obo/CHEBI_33359	['rhodium atom', 'rhodium atom']
http://purl.obolibrary.org/obo/CHEBI_33468	['phosphide(3-)', 'phosphide(3-)']
http://purl.obolibrary.org/obo/CHEBI_35780	['phosphate ion', 'phosphate ion']
http://purl.obolibrary.org/obo/CHEBI_36560	['zinc oxide', 'zinc oxide']
http://purl.obolibrary.org/obo/CHEBI_42266	['ethane', 'ethane']
http://purl.obolibrary.org/obo/CHEBI_46708	['1-octene', '1-octene']
http://purl.obolibrary.org/obo/CHEBI_48729	['zeolite', 'zeolite']
http://purl.obolibrary.org/obo/CHEBI_49637	['hydrogen atom', 'hydrogen atom']
http://purl.obolibrary.org/obo/CHEBI_49882	['rhenium atom', 'rhenium atom']
http://purl.obolibrary.org/obo/CHEBI_87315	['1-decene', '1-decene']
http://purl.obolibrary.org/obo/CHEBI_89713	['1-dodecene', '1-dodecene']
http://purl.obolibrary.org/obo/CHEBI_176570	['molybdenum-98 atom', 'molybdenum-98 atom']
http://purl.obolibrary.org/obo/MOP_0000479	['acylation', 'acylation']
http://purl.obolibrary.org/obo/MOP_0000589	['hydrogenation', 'hydrogenation']
http://purl.obolibrary.org/obo/RXNO_0000272	['hydroformylation', 'hydroformylation']

## Sheet: dataset2
http://purl.obolibrary.org/obo/CHEBI_15379	['dioxygen', 'dioxygen (molecule)']
http://purl.obolibrary.org/obo/CHEBI_16183	['methane', 'methane (molecule)']
http://purl.obolibrary.org/obo/CHEBI_16526	['carbon dioxide', 'carbon dioxide (molecule)']
http://purl.obolibrary.org/obo/CHEBI_17245	['carbon monoxide', 'carbon monoxide (molecule)']
http://purl.obolibrary.org/obo/CHEBI_17790	['methanol', 'methanol']
http://purl.obolibrary.org/obo/CHEBI_18291	['manganese atom', 'manganese atom']
http://purl.obolibrary.org/obo/CHEBI_22984	['calcium atom', 'calcium atom']
http://purl.obolibrary.org/obo/CHEBI_23014	['carbon oxide', 'carbon oxide']
http://purl.obolibrary.org/obo/CHEBI_24061	['fluorine atom', 'fluorine atom']
http://purl.obolibrary.org/obo/CHEBI_25107	['magnesium atom', 'magnesium atom']
http://purl.obolibrary.org/obo/CHEBI_25367	['molecule', 'molecule']
http://purl.obolibrary.org/obo/CHEBI_25741	['oxide', 'oxide']
http://purl.obolibrary.org/obo/CHEBI_25805	['oxygen atom', 'oxygen atom']
http://purl.obolibrary.org/obo/CHEBI_27573	['silicon atom', 'silicon atom']
http://purl.obolibrary.org/obo/CHEBI_27594	['carbon atom', 'carbon atom']
http://purl.obolibrary.org/obo/CHEBI_27998	['tungsten', 'tungsten']
http://purl.obolibrary.org/obo/CHEBI_28112	['nickel atom', 'nickel atom']
http://purl.obolibrary.org/obo/CHEBI_28984	['aluminium atom', 'aluminium atom']
http://purl.obolibrary.org/obo/CHEBI_29237	['deuterium atom', 'deuterium atom']
http://purl.obolibrary.org/obo/CHEBI_29327	['oxomethyl', 'oxomethyl']
http://purl.obolibrary.org/obo/CHEBI_30187	['aluminium oxide', 'aluminium oxide']
http://purl.obolibrary.org/obo/CHEBI_30563	['silicon dioxide', 'silicon dioxide']
http://purl.obolibrary.org/obo/CHEBI_30682	['ruthenium atom', 'ruthenium atom']
http://purl.obolibrary.org/obo/CHEBI_32234	['titanium dioxide', 'titanium dioxide']
http://purl.obolibrary.org/obo/CHEBI_32594	['barium atom', 'barium atom']
http://purl.obolibrary.org/obo/CHEBI_32999	['europium atom', 'europium atom']
http://purl.obolibrary.org/obo/CHEBI_33324	['strontium atom', 'strontium atom']
http://purl.obolibrary.org/obo/CHEBI_33336	['lanthanum atom', 'lanthanum atom']
http://purl.obolibrary.org/obo/CHEBI_33341	['titanium atom', 'titanium atom']
http://purl.obolibrary.org/obo/CHEBI_33359	['rhodium atom', 'rhodium atom']
http://purl.obolibrary.org/obo/CHEBI_33369	['cerium', 'cerium']
http://purl.obolibrary.org/obo/CHEBI_33375	['gadolinium atom', 'gadolinium atom']
http://purl.obolibrary.org/obo/CHEBI_48729	['zeolite', 'zeolite']
http://purl.obolibrary.org/obo/CHEBI_49637	['hydrogen atom', 'hydrogen atom']
http://purl.obolibrary.org/obo/CHEBI_49828	['praseodymium atom', 'praseodymium atom']
http://purl.obolibrary.org/obo/CHMO_0001501	['gasification', 'gasification']
http://purl.obolibrary.org/obo/MOP_0000568	['oxidation', 'oxidation']
http://purl.obolibrary.org/obo/MOP_0000589	['hydrogenation', 'hydrogenation']
http://purl.obolibrary.org/obo/MOP_0000619	['hydrolysis', 'hydrolysis']

## Sheet: ds2_new classes
class name	super class
support material	material
methanation	chemical reaction (molecular)
comethanation	chemical reaction (molecular)
manganese(2+);nickel(2+)	molecule
co methanation	methanation
nickel;tungsten	molecule
dioxosilane;dioxotitanium	support material
carbon;fluoride	molecule
partial oxidation	oxidation
MnOy	molecule
commercial catalyst role	catalyst role
SiO2-catalyst	molecule
γ-Al2O3	support material
Ni-zeolite	molecule
impregnated catalyst role	catalyst role
water gas shift reaction	chemical reaction (molecular)
reverse gas shift reaction	chemical reaction (molecular)
packed bed methanation	methanation
thermal degradation	degradation
pem electrolysis	chemical reaction (molecular)
selective methanation	chemical reaction (molecular)
La	molecule
metal alloy catalyst role	catalyst role

## Sheet: ds1_new classes
class name	super class
support material	material
trichlororhodium	molecule
atmospheric hydroformylation	hydroformylation
oxygen(2-);scandium(3+)	molecule
manganese(2+);oxygen(2-)	molecule
dissociation	chemical reaction (molecular)
cobalt;rhodium	molecule
cluster catalyst role	catalyst role
decarbonylation	chemical reaction (molecular)
binary catalyst role	catalyst role
monometallic catalyst role	catalyst role
bimetallic catalyst role	catalyst role
gas phase hydroformylation	hydroformylation
S-1	support material
oxygen(2-);rhodium(3+)	support material
S-1-II	molecule
nanoparticle catalyst role	catalyst role
oleﬁn	molecule
atomically dispersed catalyst role	catalyst role
liquid phase hydroformylation	hydroformylation
Rh2P	molecule
phenylpropionyl	molecule
rhodium phosphide	molecule
ReOx	molecule
γ-alumina	molecule
Rh7Co1P4	molecule
Rh8-xCoxP4	molecule
heterogeneous catalyst role	catalyst role
heterogeneous hydroformylation	hydroformylation
MCM-41	molecule
transition - metal catalyst role	catalyst role
atom catalyst role	catalyst role
single catalyst role	catalyst role
pair site catalyst role	catalyst role
RhZn	molecule
's wilkinson catalyst role	catalyst role
Rh(111)	molecule
publication	Thing
metal catalyst role	catalyst role
rhodium-tungsten oxide	support material
